# Supplementary material for: Constructing helical nanowires via polymerization-induced self-assembly
Source: Royal Society of Chemistry journal article supplement (doi:10.1039/d1ra00439e), 2021-01-01
Supplement: d1ra00439e1.pdf [file d1ra00439e1.pdf]

## Supporting Information

### Constructing helical nanowires via polymerization-induced self-assembly

Qiumeng Chen,<sup>a</sup> Yahui Li,<sup>a</sup> Ming Liu,<sup>a</sup> Xuan Wu,<sup>b</sup> Jianliang Shen<sup>\*a,b</sup> and Liangliang Shen<sup>\*a</sup>

**Abstract:** While reliable strategies for constructing block copolymer (BCP) nanowires have been developed, helical nanowires are rarely reported in polymerization-induced self-assembly (PISA). Herein, in this work, a new strategy for constructing helical nanowires was developed via PISA mediated by a fluorinated stabilizer block. Ultralong nanowires with helical structure can be readily produced in a wide range of block compositions. In addition, the generality of this strategy was well testified by expanding monomer types. The achiral BCP nano-objects underwent a morphology transition from spheres to helical nanowires during aging. We believe this work will provide a general strategy for producing helical nanowires through PISA of achiral BCPs.

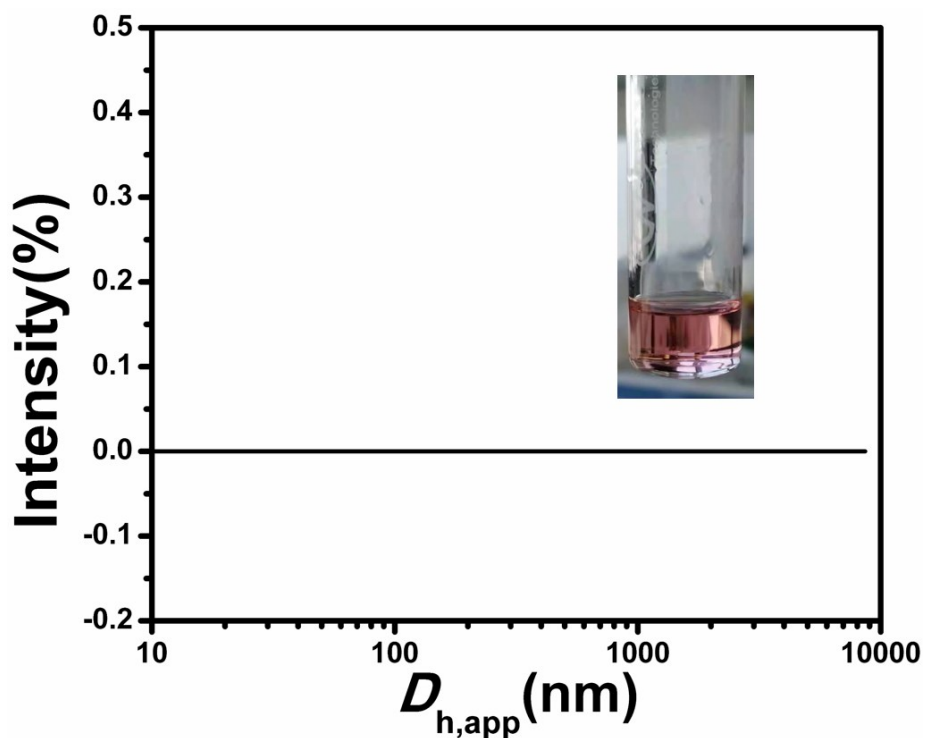

**Figure S1.** DLS result of P(DMAEMA<sub>27</sub>-*co*-TFEMA<sub>3</sub>)-CTA ethanol solution with the polymer concentration of 60 mg mL<sup>-1</sup>. As the inset image shown, the polymer solution was clear and transparent, indicating that no colloidal dispersion formed.

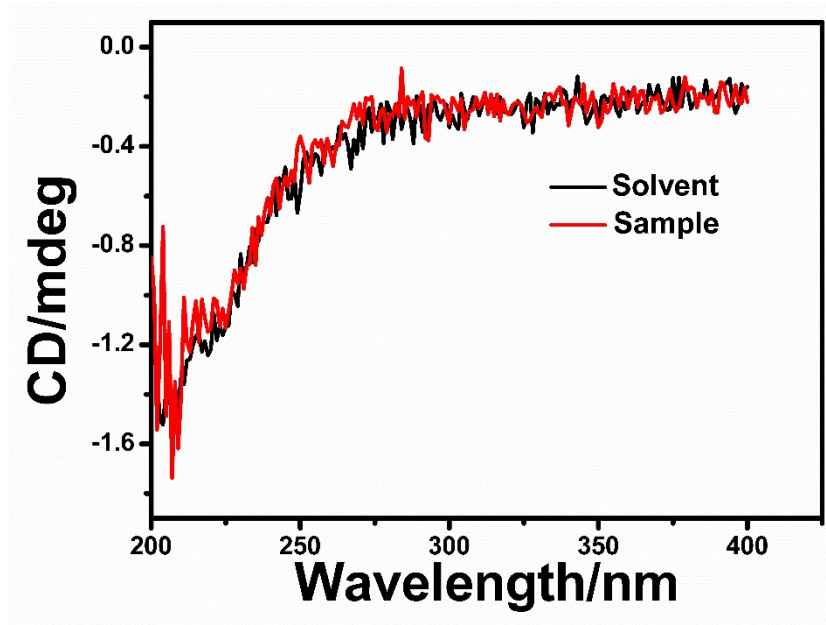

**Figure S2.** CD spectra of P(DMAEMA<sub>27</sub>-*co*-TFEMA<sub>3</sub>)-*b*-PFHEMA<sub>20</sub> nanowire helices ethanol solution in 1 cm quartz cell.

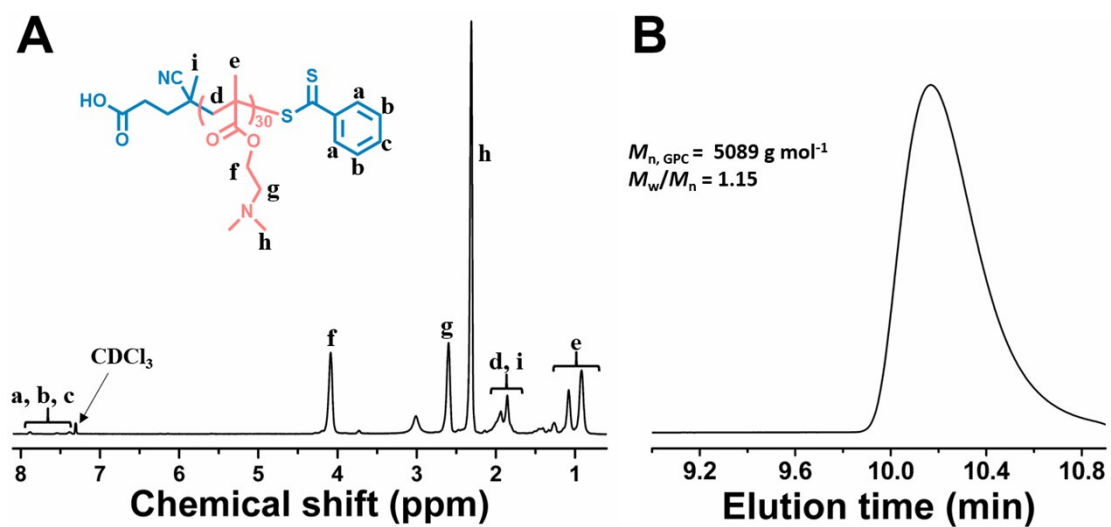

**Figure S3.** A)  $^1\text{H}$  NMR spectrum of PDMAEMA<sub>31</sub>-CTA in CDCl<sub>3</sub>; B) GPC trace of PDMAEMA<sub>31</sub>-CTA using THF as the eluent.

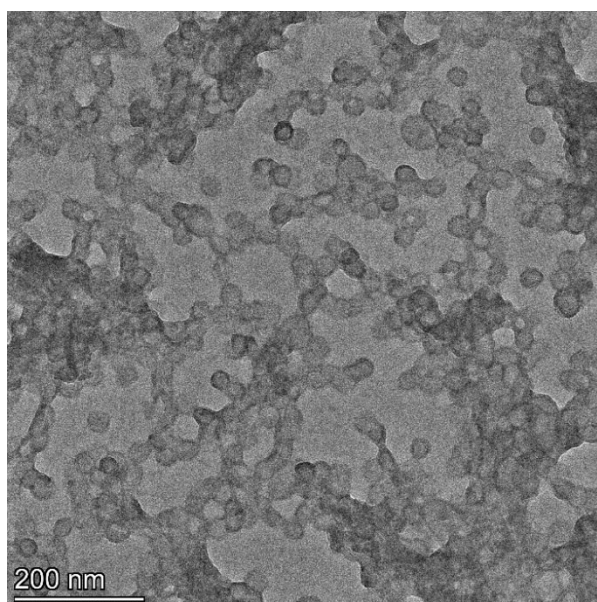

**Figure S4.** TEM micrograph of PDMAEMA<sub>31</sub>-*b*-PFHEMA<sub>30</sub> nano-objects. The TEM sample was prepared after aging for 7 days.

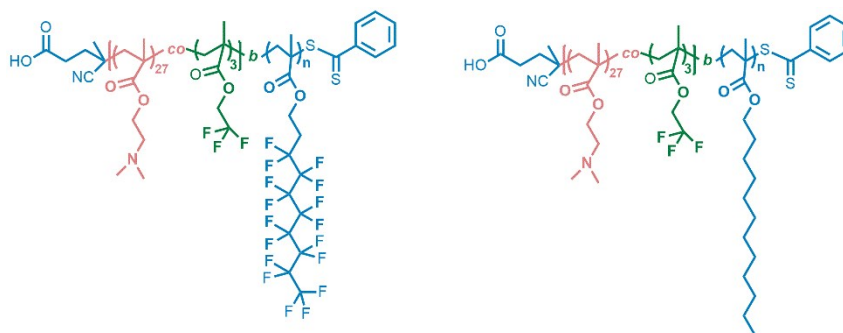

Scheme S1. Chemical structures of P(DMAEMA<sub>27</sub>-*co*-TFEMA<sub>3</sub>)-*b*-PHDFDMA<sub>n</sub> (left) and P(DMAEMA<sub>27</sub>-*co*-TFEMA<sub>3</sub>)-*b*-PLMA<sub>n</sub> (right) BCPs.

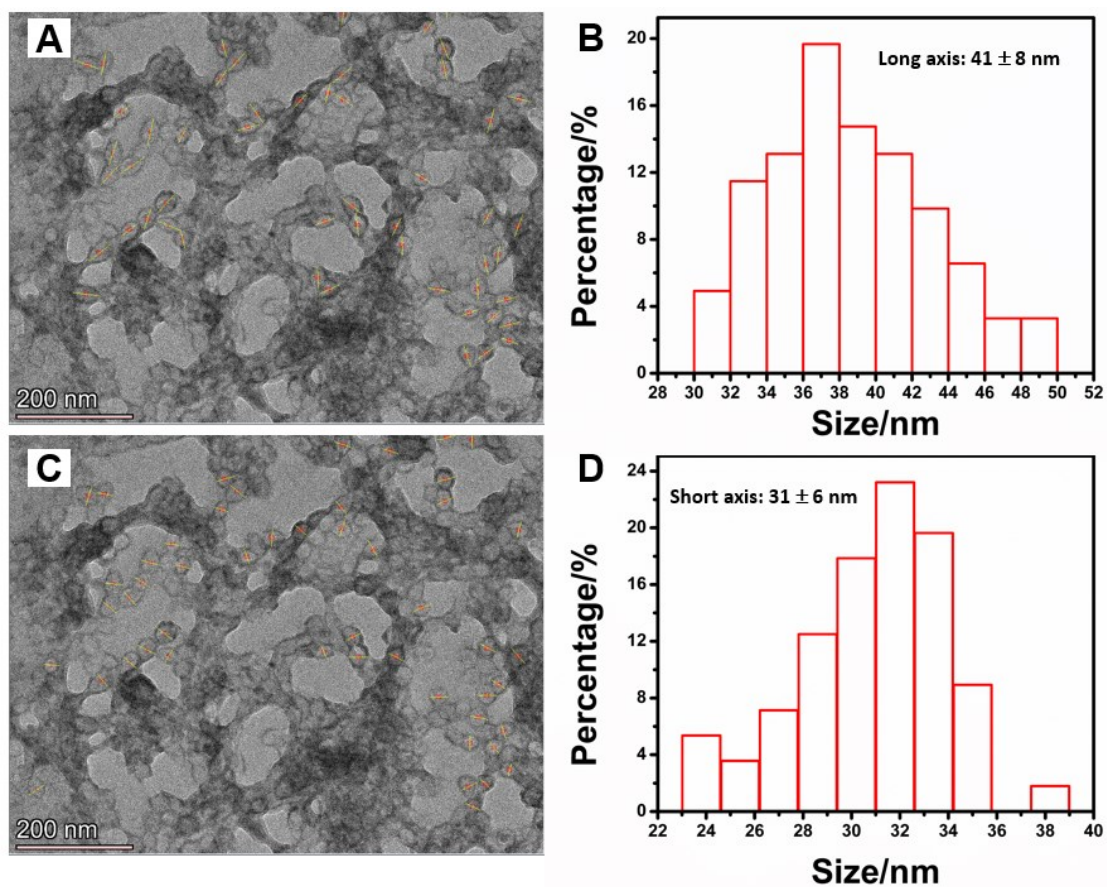

**Figure S5.** Statistical analysis of long axis (A and B) and short axis (C and D) of P(DMAEMA<sub>27</sub>-*co*-TFEMA<sub>3</sub>)-*b*-PHDFDMA<sub>30</sub> ellipsoidal nanoparticles.
